# Supplementary material for: PEEK–WC-Based Mixed Matrix Membranes Containing Polyimine Cages for Gas Separation
Source: MDPI journal article supplement (doi:10.3390/molecules26185557), 2021-09-13
Supplement: s1 [file s1]

# PEEK-WC-based Mixed Matrix Membranes Containing Polyimine Cages for Gas Separation

Marcello Monteleone <sup>1</sup>, Riccardo Mobili <sup>2</sup>, Chiara Milanese <sup>2</sup>, Elisa Esposito <sup>1</sup>, Alessio Fuoco <sup>1,\*</sup>, Sonia La Cognata<sup>2,\*</sup>, Valeria Amendola <sup>2</sup> and Johannes C. Jansen <sup>1</sup>

<sup>1</sup> Institute on Membrane Technology, National Research Council of Italy (CNR-ITM), via P. Bucci 17/C, Rende (CS), 87036, Italy: m.monteleone@itm.cnr.it (M.M) e.esposito@itm.cnr.it (E.E), jc.jansen@itm.cnr.it (J.C.J.)

<sup>2</sup> Dipartimento di Chimica, Università di Pavia, via Taramelli 12, I-27100 Pavia, Italy: riccardo.mobili01@universitadipavia.it (R.M.), chiara.milanese@unipv.it (C.M.), valeria.amendola@unipv.it (V.A.)

\* Correspondence: a.fuoco@itm.cnr.it (A.F.), sonia.lacognata01@universitadipavia.it (S.L.C.)

## Index

|                                                                |   |
|----------------------------------------------------------------|---|
| 1. Characterization of the Cages.....                          | 2 |
| 1.1 <sup>1</sup> H-NMR spectra.....                            | 2 |
| 1.2 FTIR-ATR spectra.....                                      | 4 |
| 2. Differential scanning calorimetric (DSC) measurements ..... | 6 |

## 1. Characterization of the Cages

### 1.1 $^1\text{H}$ -NMR spectra

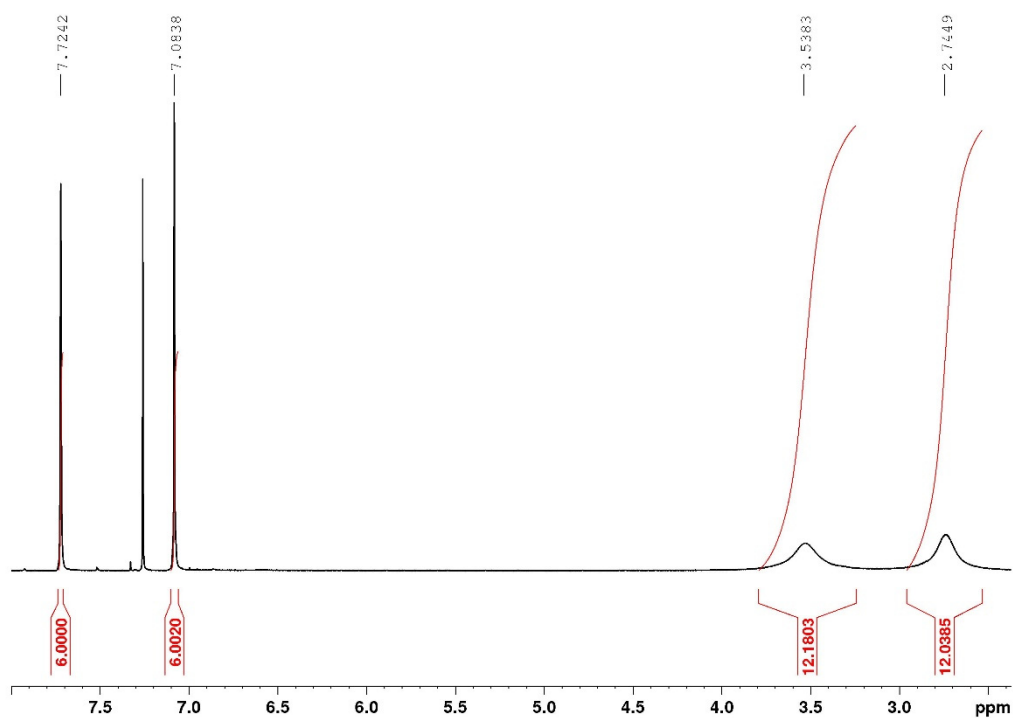

Figure S1.  $^1\text{H}$ -NMR spectrum of Fura in  $\text{CDCl}_3$ .

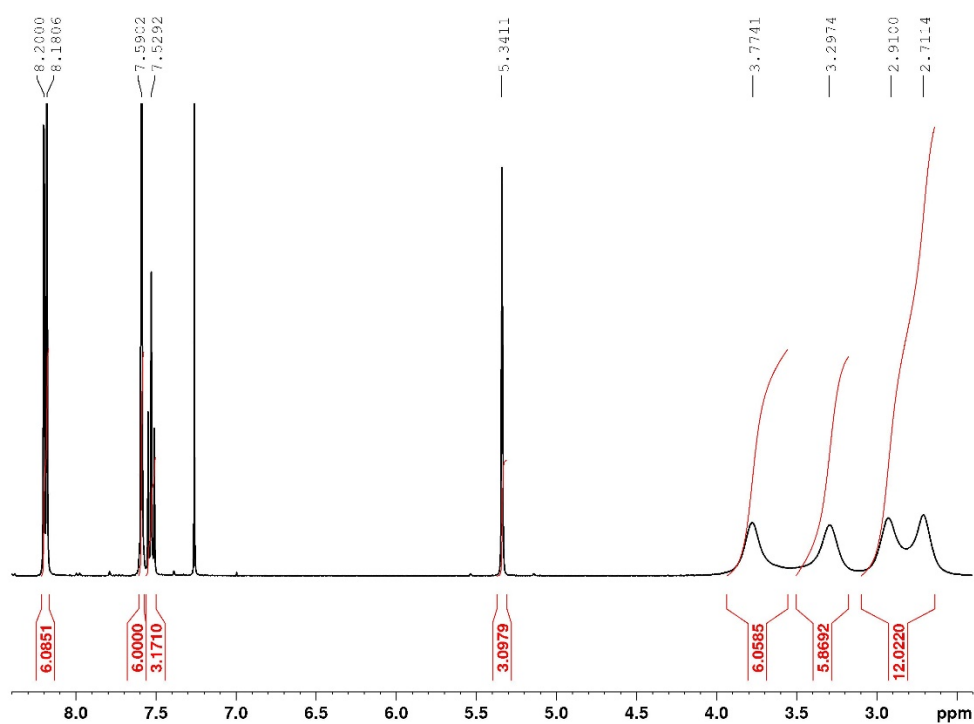

Figure S2.  $^1\text{H}$ -NMR spectrum of m-xy in  $\text{CDCl}_3$ .

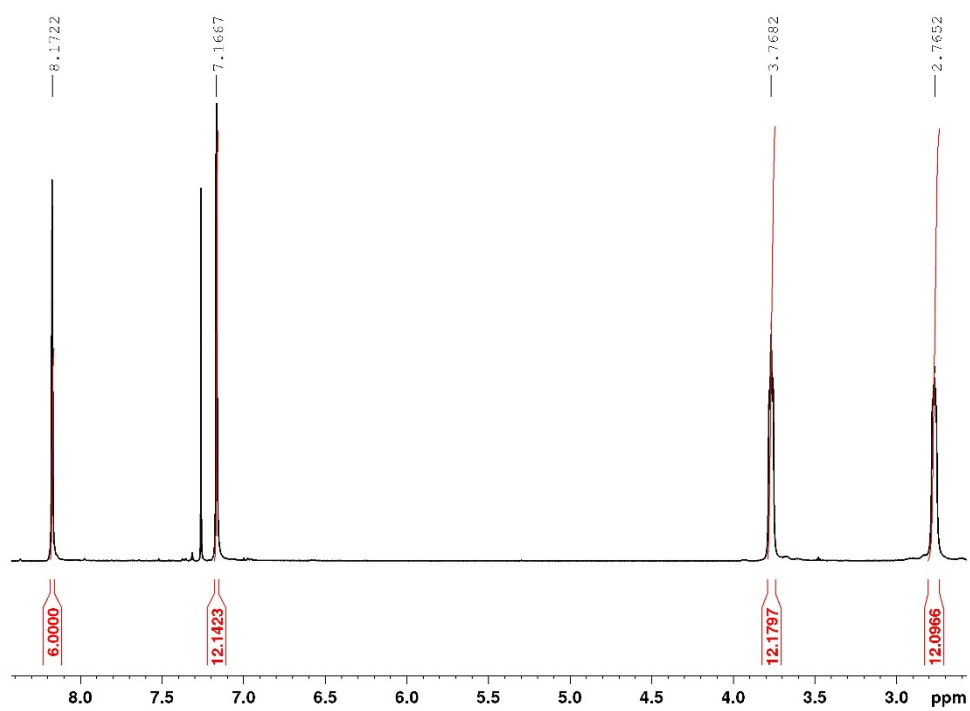

Figure S3.  $^1\text{H}$ -NMR spectrum of p-xy in  $\text{CDCl}_3$ .

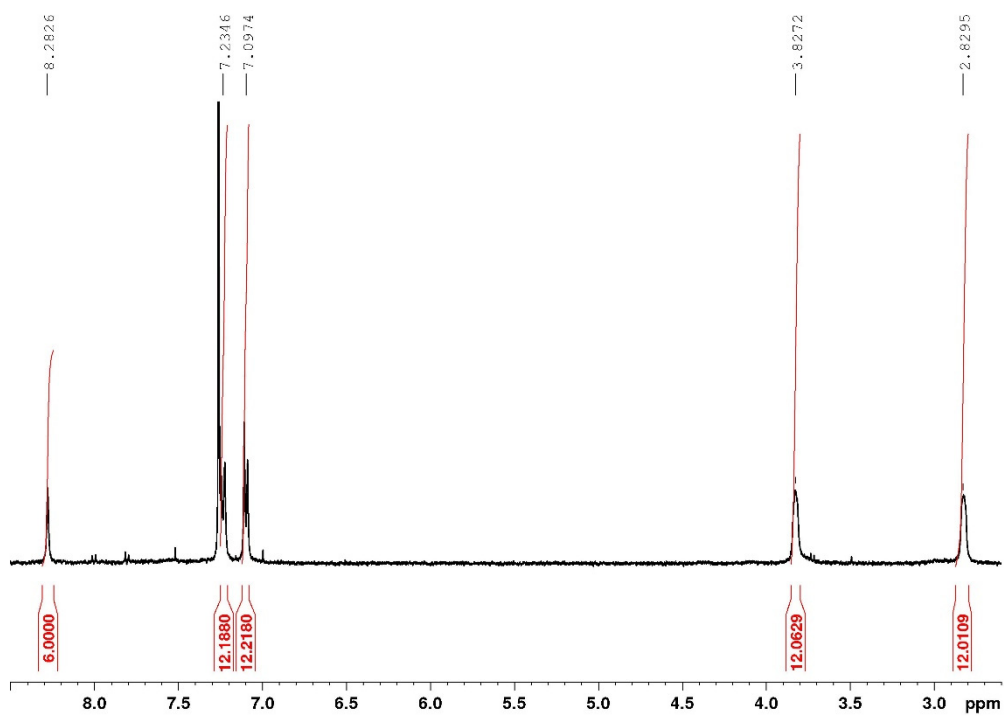

Figure S4.  $^1\text{H}$ -NMR spectrum of the diphenyl cage in  $\text{CDCl}_3$ .

## 1.2 FTIR-ATR spectra

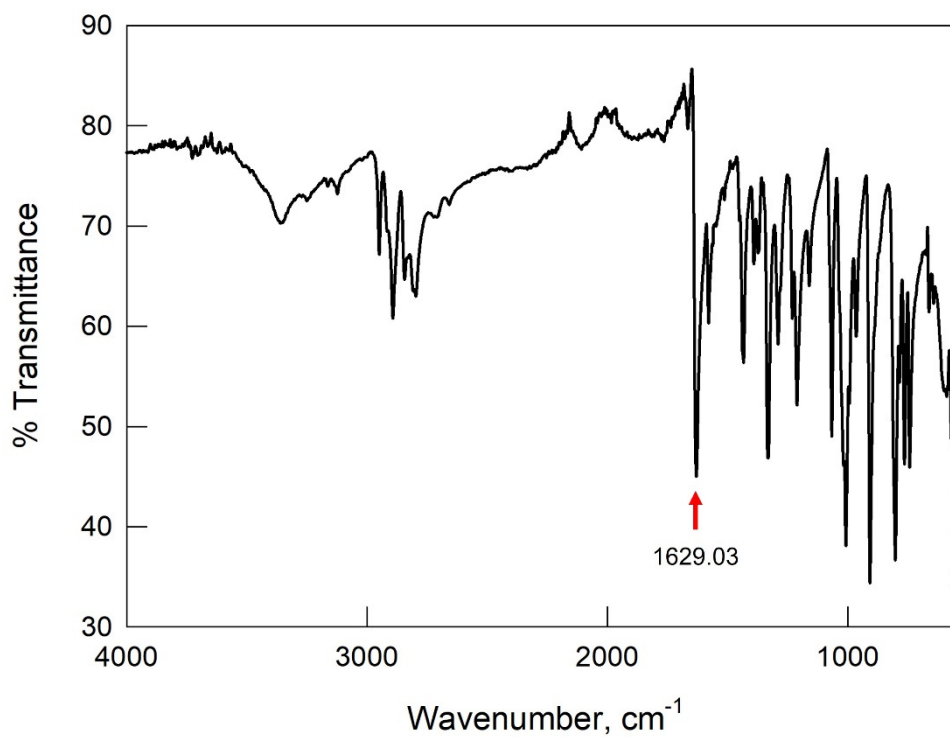

Figure S5. FTIR-ATR spectrum of Fura.

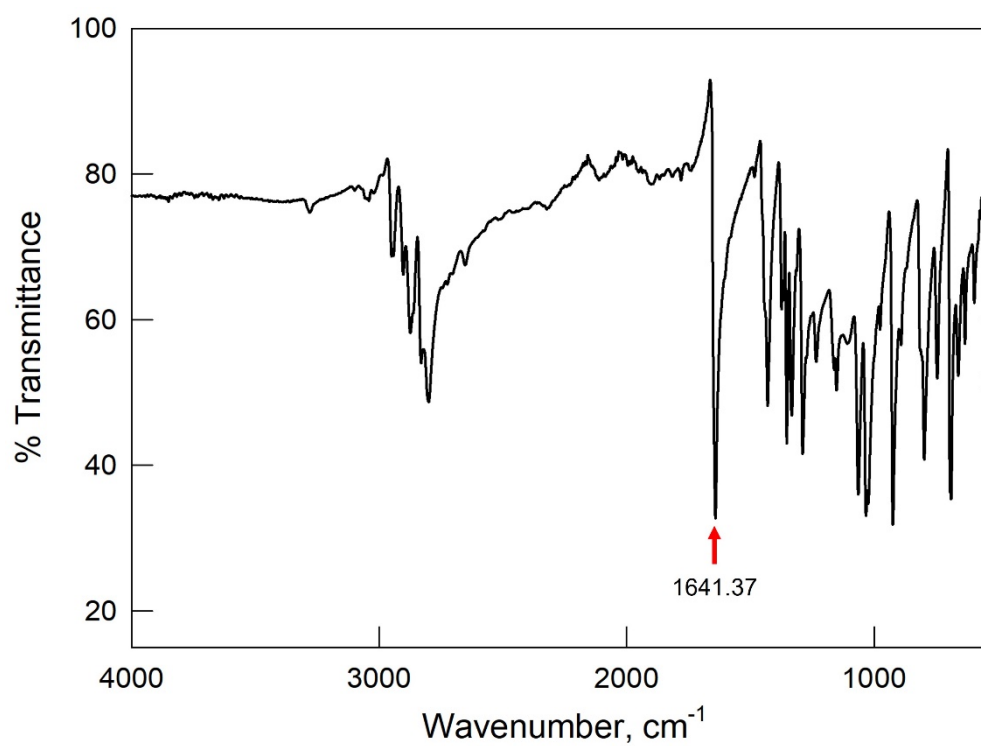

Figure S6 FTIR-ATR spectrum of m-xy.

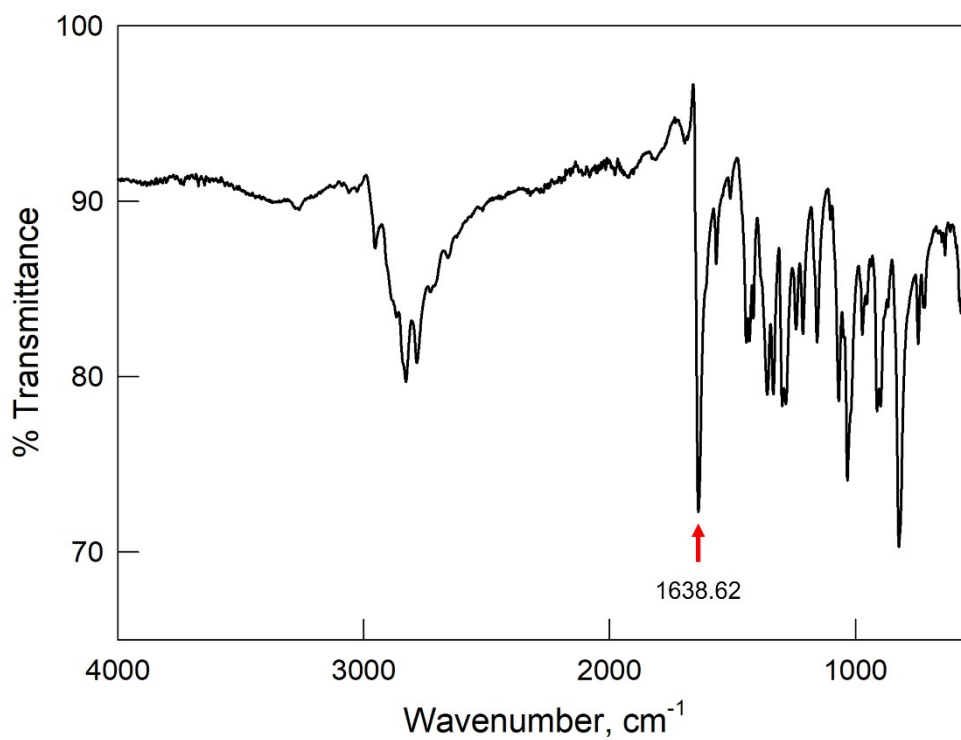

Figure S7 FTIR-ATR spectrum of p-xy

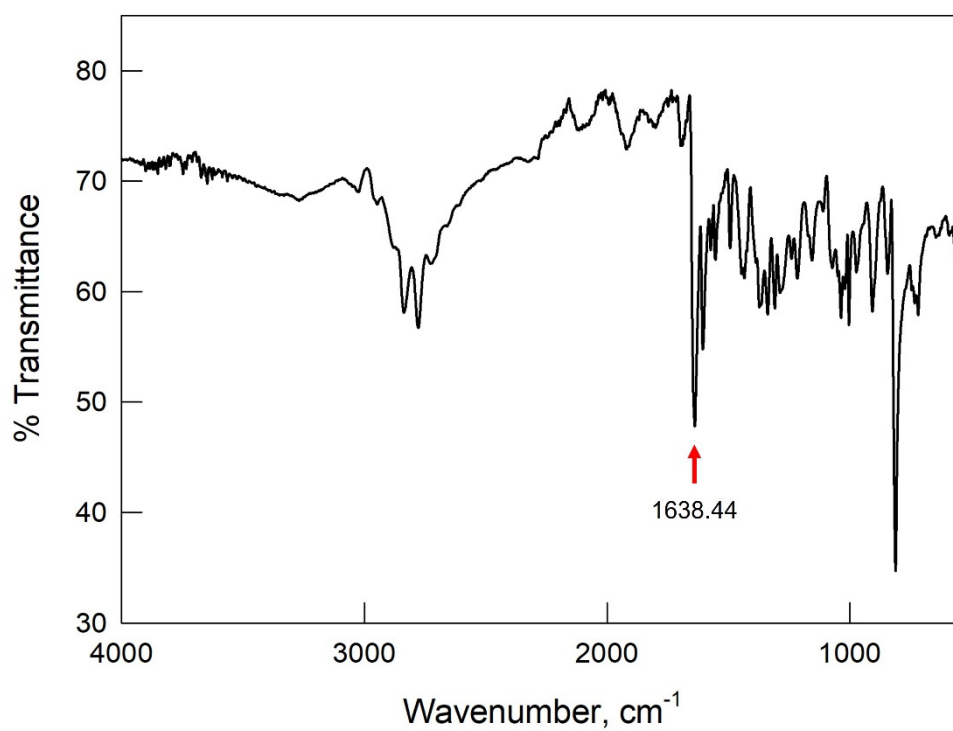

Figure S8 FTIR-ATR spectrum of the diphenyl cage.

## 2. Differential scanning calorimetric (DSC) measurements

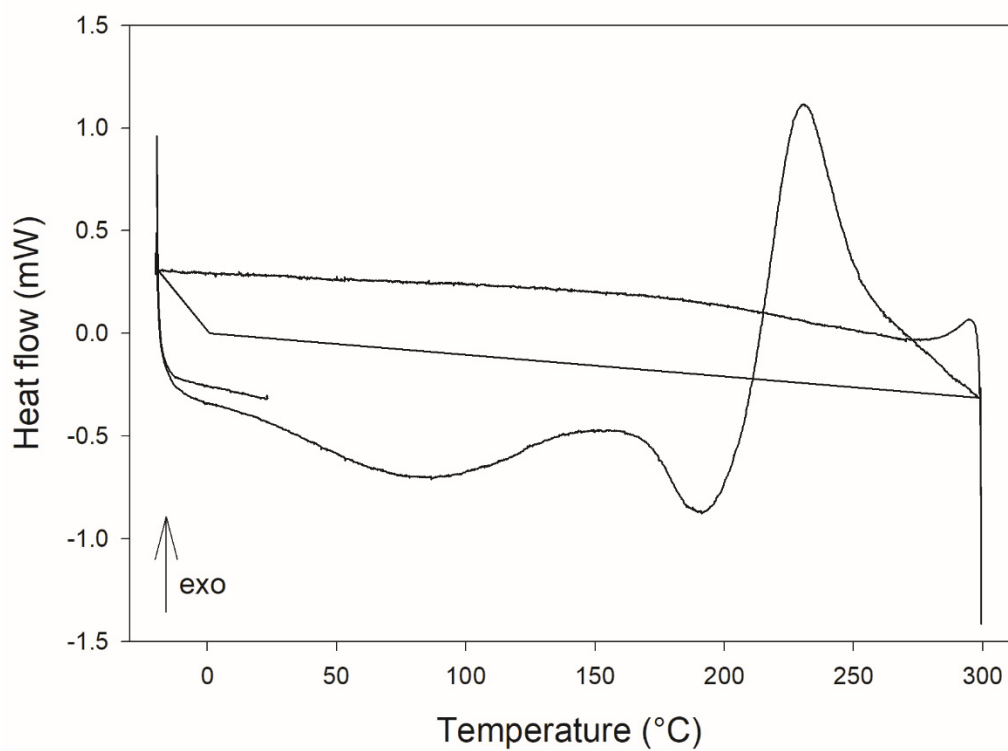

Figure S9 DSC curve of Fura.

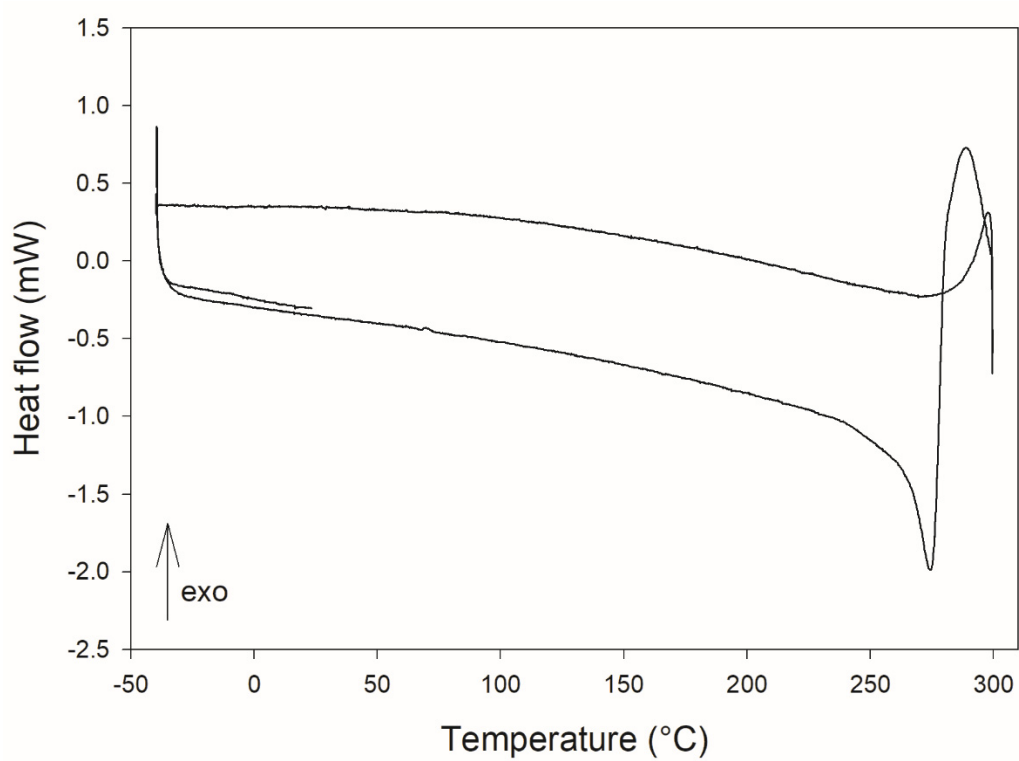

Figure S10 DSC curve of m-xy

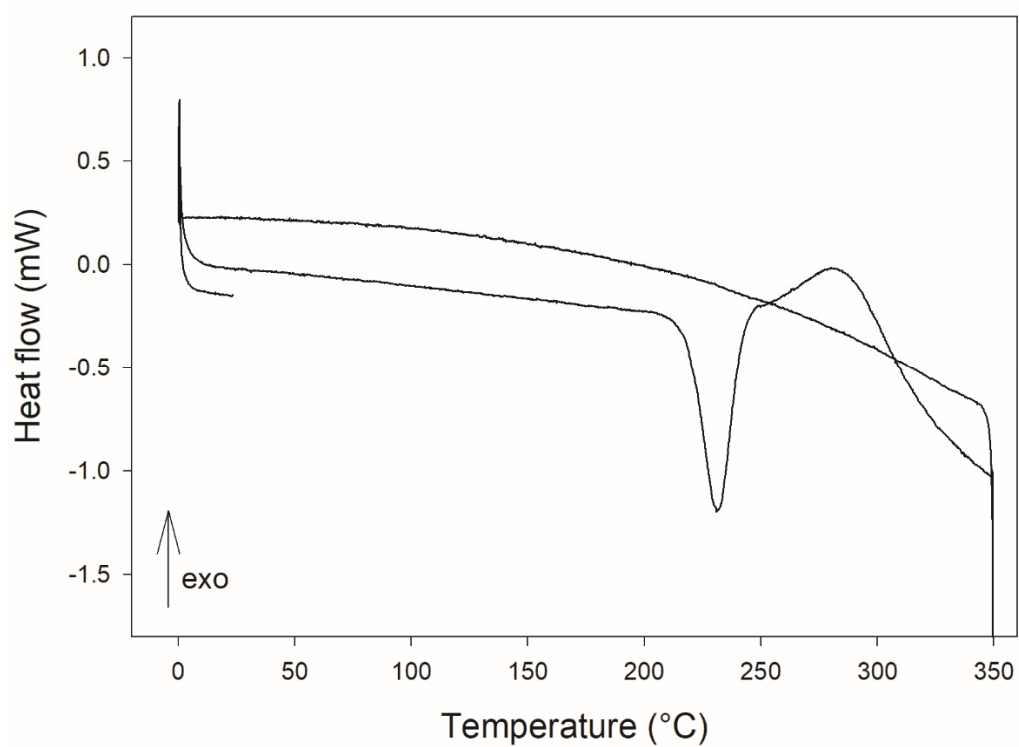

Figure S11 DSC curve of p-xy.

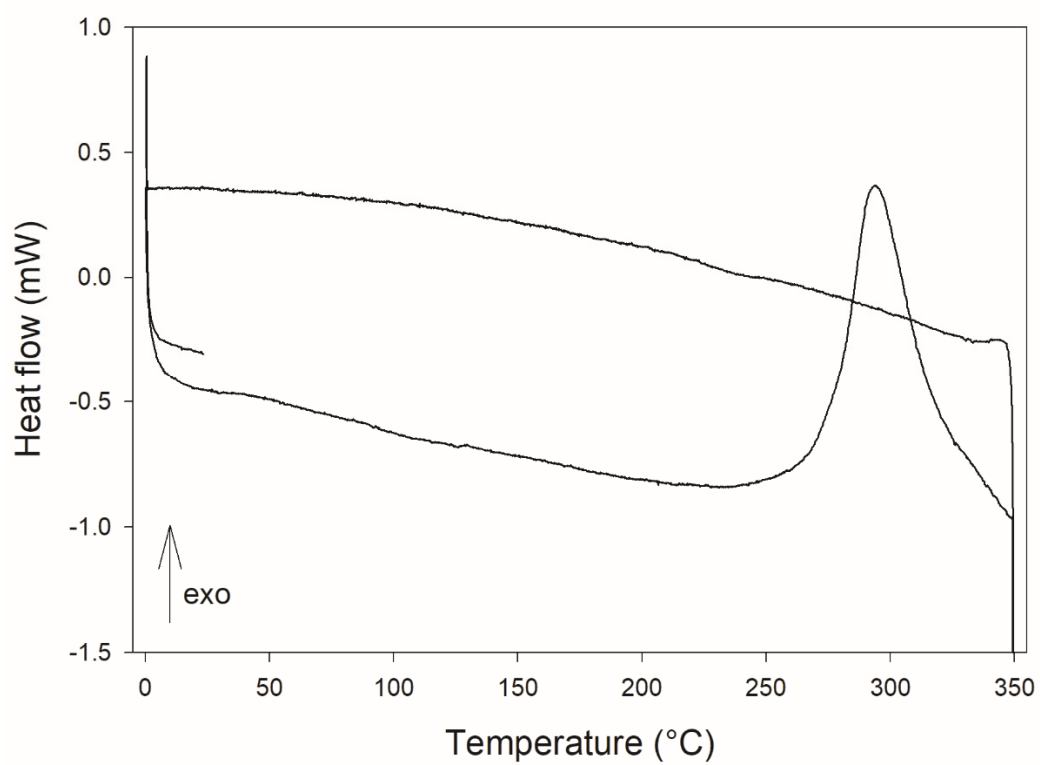

Figure S12 DSC curve of the diphenyl cage.
